# Supplementary material for: Solution-phase synthesis of γ-In2Se3 nanoparticles for highly efficient photocatalytic hydrogen generation under simulated sunlight irradiation
Source: Royal Society of Chemistry journal article supplement (doi:10.1039/c6ra21784b), 2016-01-01
Supplement: c6ra21784b1.pdf [file c6ra21784b1.pdf]

Electronic Supplementary Information (ESI) for

**Solution-phase synthesis of  $\gamma$ - $\text{In}_2\text{Se}_3$  nanoparticles for highly efficient photocatalytic hydrogen generation under simulated sunlight irradiation**

Shuang Yang <sup>a, b</sup>, Cheng-Yan Xu <sup>a, b \*</sup>, Li Yang <sup>a</sup>, Sheng-Peng Hu <sup>a, b, c</sup> and Liang Zhen <sup>a, b</sup>

\*

<sup>a</sup> School of Materials Science and Engineering, Harbin Institute of Technology, Harbin 150001, China

<sup>b</sup> MOE Key Laboratory of Micro-System and Micro-Structures Manufacturing, Harbin Institute of Technology, Harbin 150080, China

<sup>c</sup> School of Materials Science and Engineering, Harbin Institute of Technology at Weihai, Weihai 264209, China

Corresponding authors: Tel: 86-451-8641-2133; Fax: 86-451-8641-3921; E-mail: cy\_xu@hit.edu.cn; lzhen@hit.edu.cn

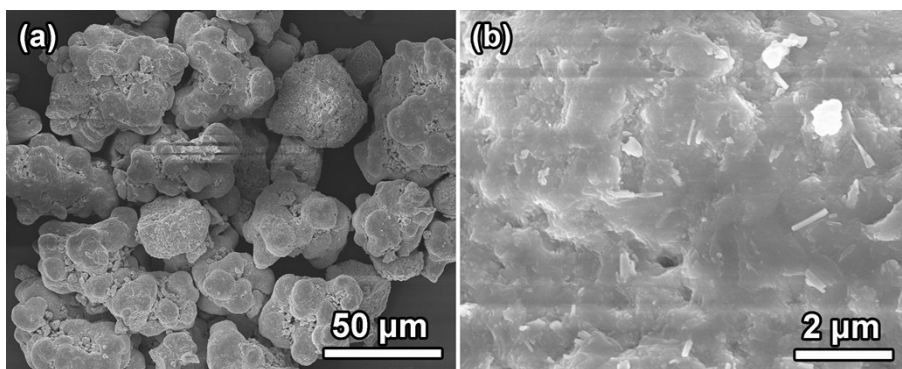

**Fig. S1** SEM images of raw selenium powder at different magnifications.

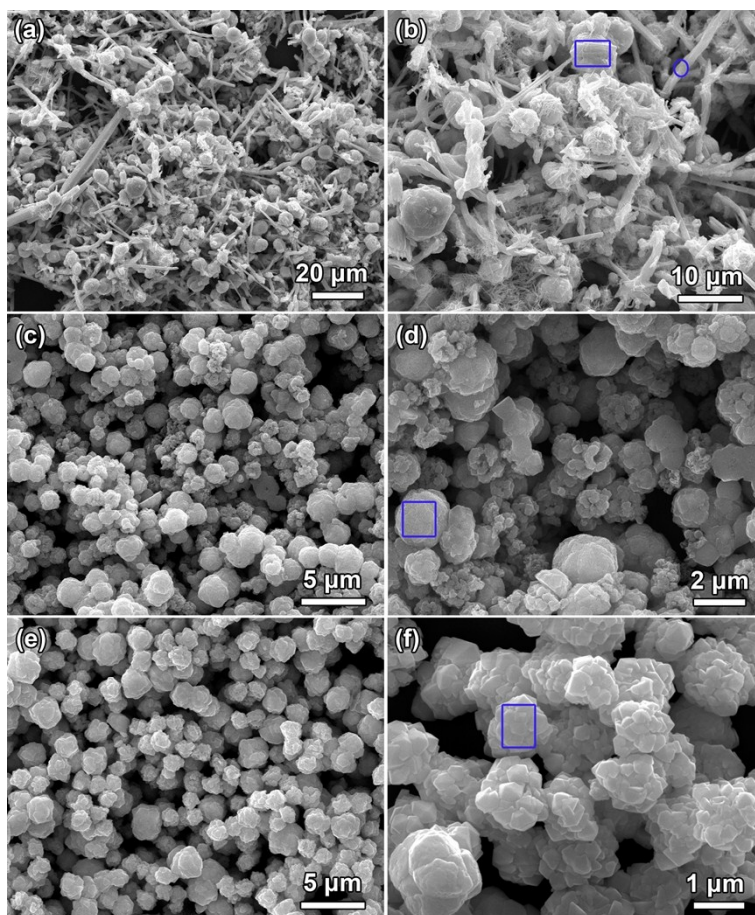

**Fig. S2** SEM images of the products synthesized at different injection temperatures: (a, b) 210°C;  
(c, d) 220°C; (e, f) 230°C.

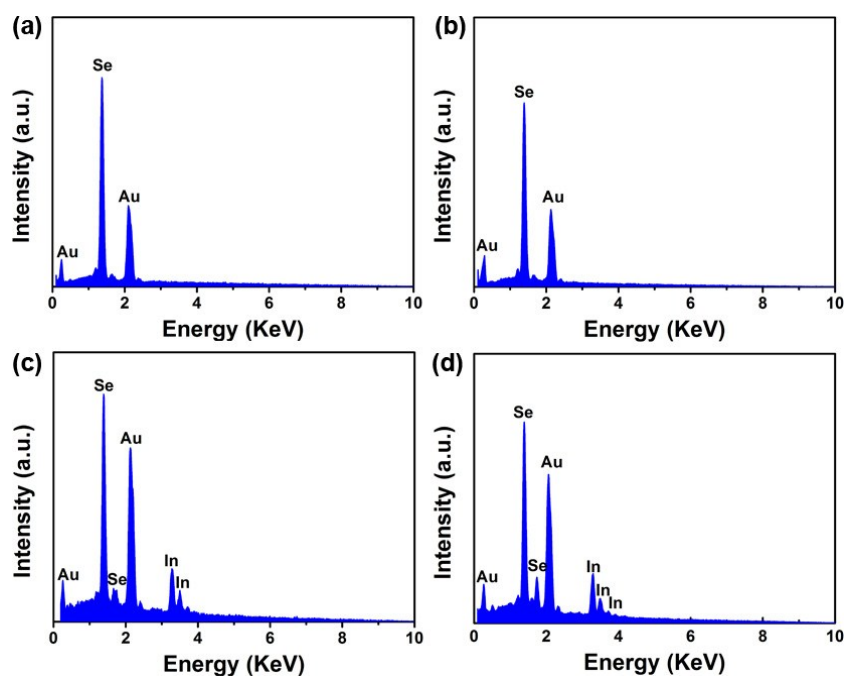

**Fig. S3** EDS spectra of the products synthesized at injection temperatures of (a) 210°C (microrod: the blue circle in Fig. S1b); (b) 210°C (microsphere: the blue rectangle in Fig. S1b); (c) 220°C (microsphere: the blue rectangle in Fig. S1d); (d) 230°C (microsphere: the blue rectangle in Fig. S1f).

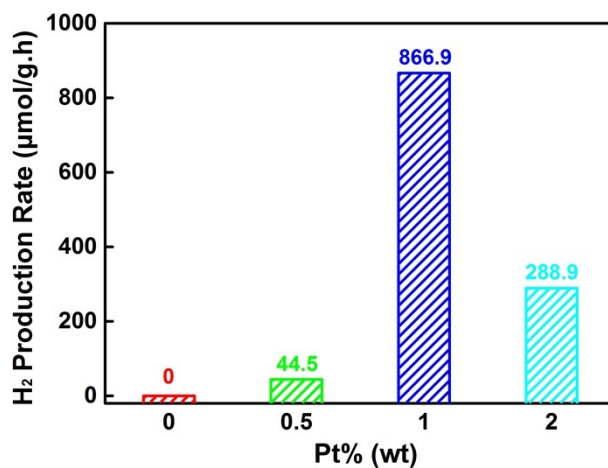

**Fig. S4** Comparison of photocatalytic hydrogen production rate of the  $\gamma$ - $\text{In}_2\text{Se}_3$  nanoparticles with different amounts of Pt loaded.
